# Supplementary material for: Pulsed-grown graphene for flexible transparent conductors
Source: Royal Society of Chemistry journal article supplement (doi:10.1039/c8na00181b), 2019-01-01
Supplement: c8na00181b1.pdf [file c8na00181b1.pdf]

## **Supporting Information for**

### **Pulsed-Grown Graphene for Flexible Transparent Conductors**

Pramoda K. Nayak\*

Department of Physics, Indian Institute of Technology Madras, Chennai 600036, India

#### **Contents:**

1. Experimental details of pulse growth graphene
2. Effect of dwell time of CH<sub>4</sub> pulses on graphene growth
3. Schematics of modified graphene growth mechanism using CH<sub>4</sub> pulses
4. Optical photographs of graphene transfer process
5. Schematics of experimental processes to reduce sheet resistance
6. Sheet resistance measurement using van der Pauw method
7. Reduction in sheet resistance of graphene prepared by continuous flow method
8. Schematics of bending angle and strain calculation

\*E-mail: pnayak@iitm.ac.in

## Supporting Figures

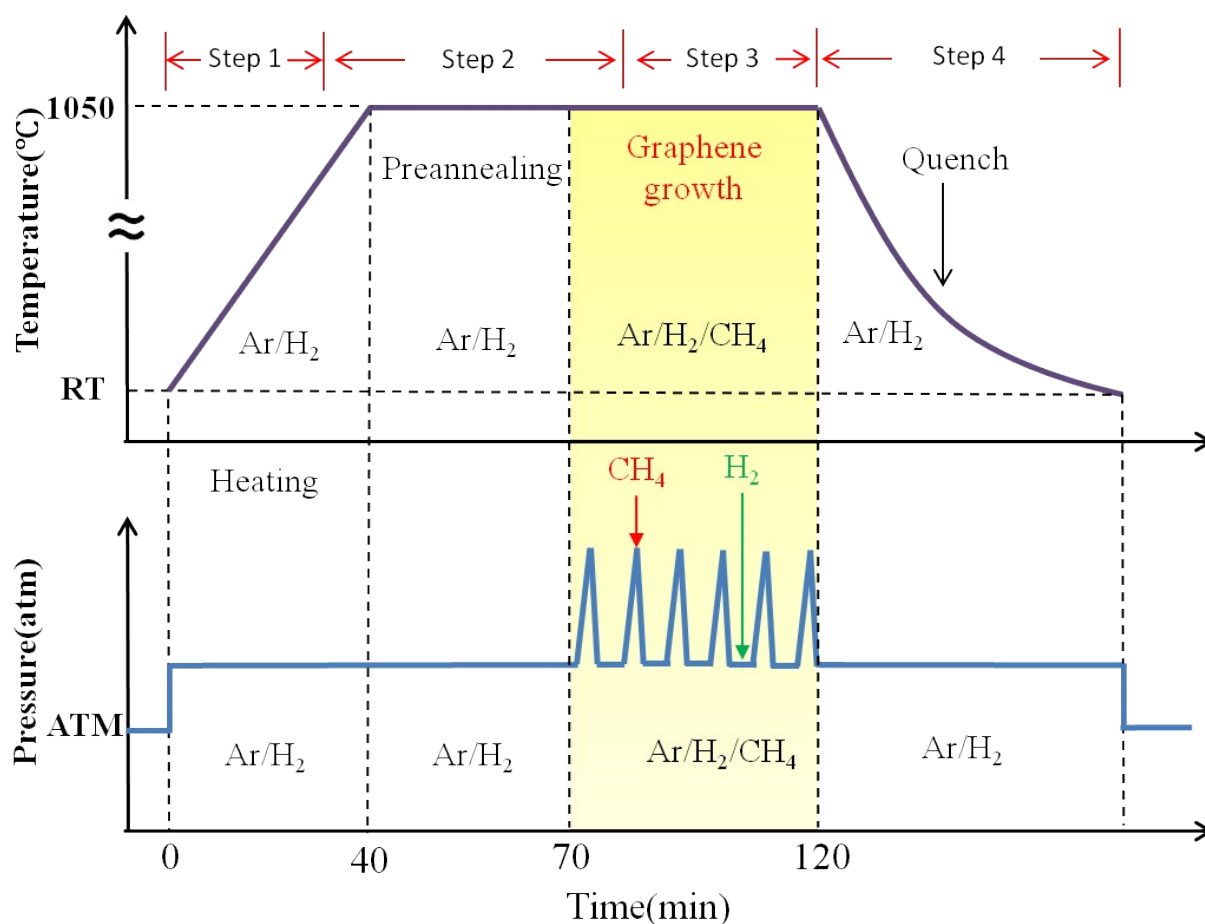

**Fig. S1** Experimental details of pulse growth graphene. Temperature and pressure vs. time for modified AP-CVD growth of graphene on polycrystalline Cu foil. In step 1, the furnace was ramped up to 1050°C during 40 min. In step 2, pre-annealing of Cu foil was carried out at 1050°C for 30 min to enhance the grain size and smoothen the Cu surface. In step 3, methane with a flow rate of < 1 sccm was fed into the reaction chamber for 50 min (15-25 cycles) during which graphene growth occurs. In each cycle, a CH<sub>4</sub> pulse was active for 30s and then released for 1 min. Finally, in step 4, the Cu foil was moved to the cooling zone where a cooling system was equipped. Steady flow of 10-20 sccm hydrogen and 300 sccm of Ar was maintained throughout all the steps.

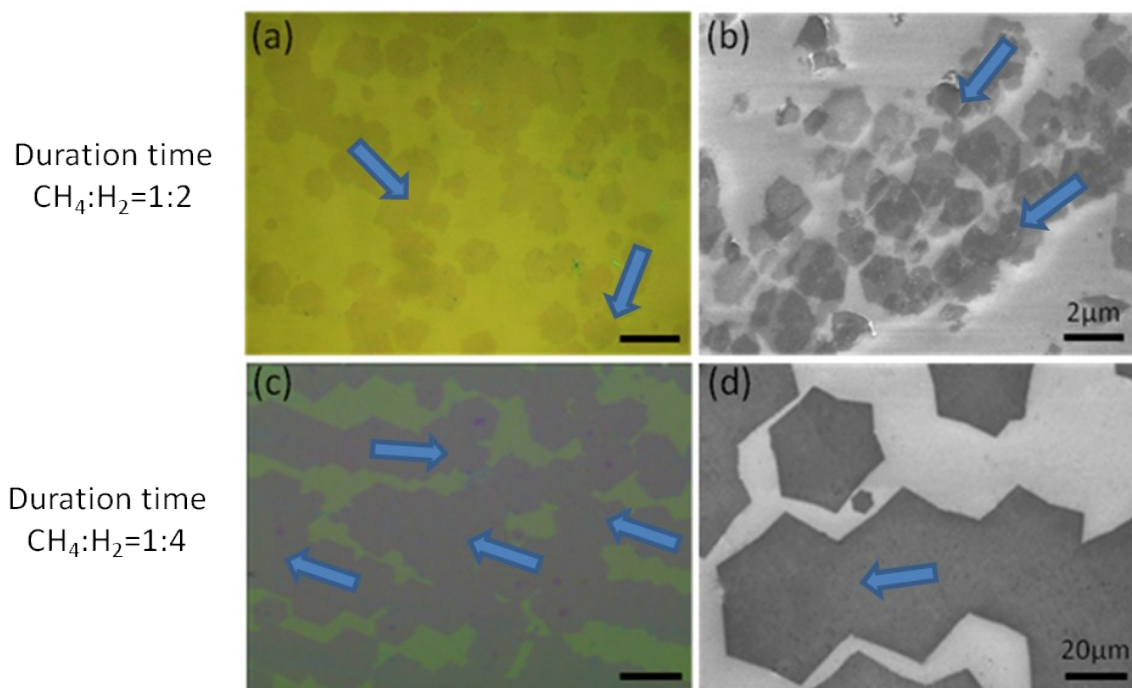

**Fig. S2** Effect of dwell time of  $\text{CH}_4$  pulses on graphene growth. (a-b) OM and SEM images of graphene grown for short duration time ratio of  $\text{CH}_4:\text{H}_2=1:2$  and (c-d) that of long duration time ratio of  $\text{CH}_4:\text{H}_2=1:4$ . The average graphene domain size is small for longer dwell time of  $\text{CH}_4$  pulses (a, b) and is large for shorter dwell time of  $\text{CH}_4$  pulses (c, d). Scales bar is  $2\mu\text{m}$  for (a, b) and  $20\mu\text{m}$  for (c, d). The arrows show the preferred orientation of the graphene domains.

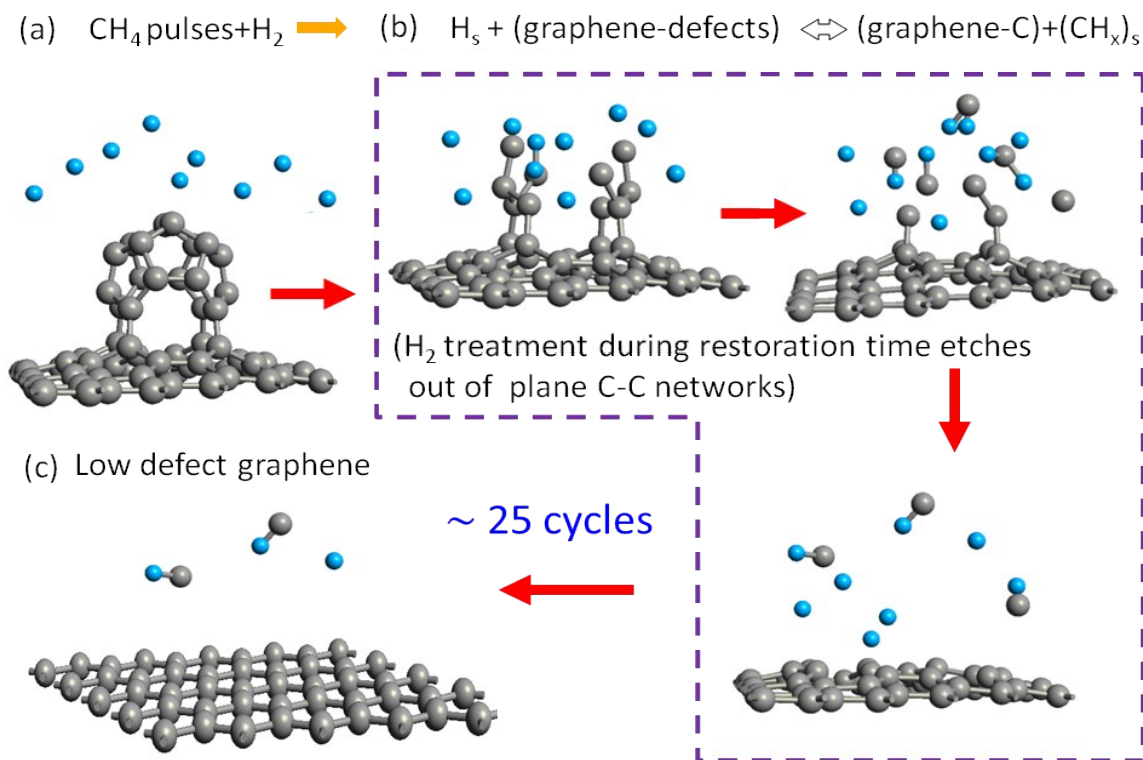

**Fig. S3** Schematics of graphene growth mechanism using  $\text{CH}_4$  pulses. (a) Evolution of surface defects emerging from unexpected bumps, protrusions, and grooves on the surface. (b) The  $\text{H}_2$  treatment during restoration time after each  $\text{CH}_4$  pulse etches out irregular carbon formations and leaves only  $sp^2$  carbon networks. (c) Alternating 25 cycles of  $\text{CH}_4$  promote the complete transformation of carbon into low defect  $sp^2$  C-C networks.

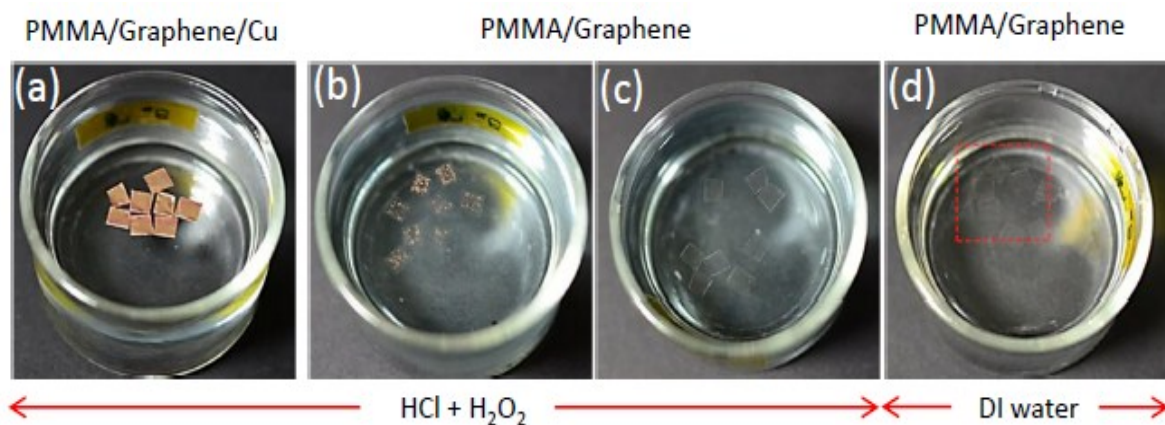

**Fig S4.** Optical photographs of graphene transfer process.

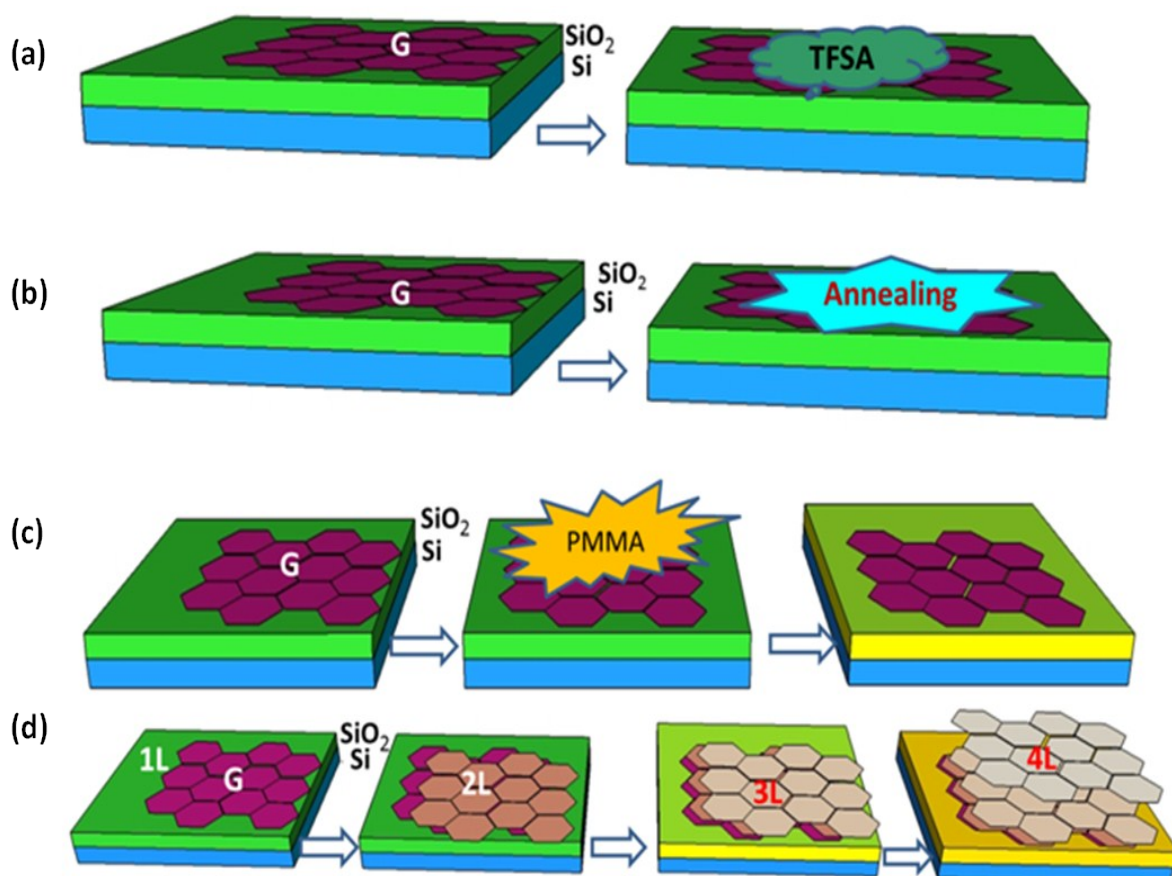

**Fig. S5** Schematics showing (a) TFSA doping, (b) post annealing, (c) flattening using PMMA and (d) stacking of graphene films prepared on SiO<sub>2</sub> substrate.

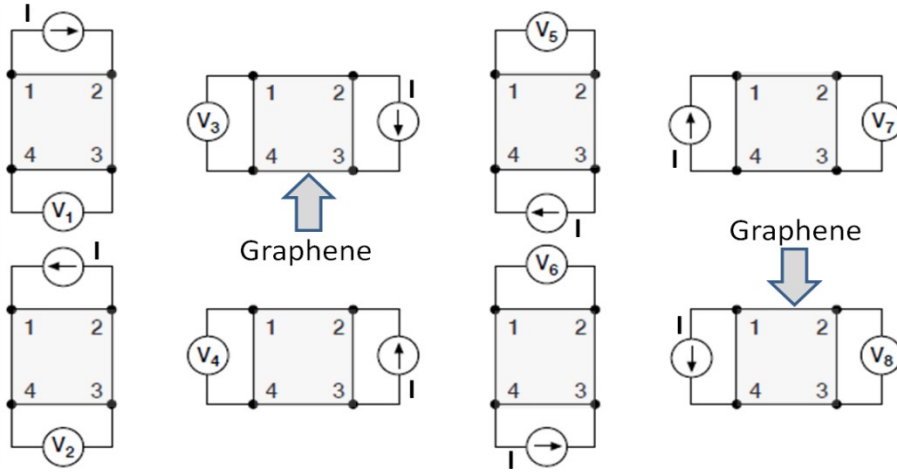

**Fig. S6** Schematics of sheet resistance measurement using van der Pauw method.

The sheet resistances of prepared graphene films were measured in ambient conditions using van der Pauw method as shown in the Fig.S6. The samples were placed on a probe station with tungsten microprobes (10  $\mu\text{m}$  in radius). Four probes were made on the samples using silver paste. The current was supplied using current source (Keithley 2400) and voltages were measured using voltage meter (Keithley 2000). Once all the eight voltage measurements were taken, two values of resistivity such as vertical resistivity ( $\rho_A$ ) and horizontal resistivity ( $\rho_B$ ) were derived as using the following formulas;

$$(1), \quad \rho_A = (\pi / \ln 2) f_A t_s (V_1 - V_2 + V_3 - V_4) / 4I$$

$$(2), \quad \rho_B = (\pi / \ln 2) f_B t_s (V_5 - V_6 + V_7 - V_8) / 4I$$

Where,  $t_s$  is the sample thickness;  $f_A$  and  $f_B$  are geometrical factors based on sample symmetry. They are related to the two resistance ratios  $Q_A$  and  $Q_B$  as shown in the following equations.

$$(3), \quad Q_A = (V_1 - V_2) / (V_3 - V_4)$$

$$(4), \quad Q_B = (V_5 - V_6) / (V_7 - V_8)$$

Finally, the average resistivity ( $\rho_{AVG}$ ) was calculated using the formula below;

(5)

$$\rho_{AVG} =$$

$$(\rho_A + \rho_B) / 2$$

**Table S1:** Reduction in sheet resistance ( $\Delta R_s$  %) of graphene prepared by continuous flow method using various procedures adopted in literatures.

| Methods               | References                                                                     | $\Delta R_s$ % |
|-----------------------|--------------------------------------------------------------------------------|----------------|
| TFSA doping           | Lai <i>et al. IEEE conf.</i> , 2013, 2436-2438. <sup>32</sup>                  | 62-75          |
|                       | Miao <i>et al. Nano Lett.</i> , 2012, 12, 2745–2750. <sup>19</sup>             | 30             |
|                       | Tongay <i>et al. Nanotechnology</i> , 2011, 22, 425701. <sup>33</sup>          | 70             |
| Annealing             | Tolochko <i>et al. J. Phys.: Conf. Ser.</i> , 2017, 816, 012012. <sup>35</sup> | 07             |
|                       | Choi <i>et al. IEEE T. Nanotechnol.</i> , 2015, 14, 70-74. <sup>36</sup>       | 20-30          |
| Stacking              |                                                                                |                |
| 3 layer graphene      | Xu <i>et al. Nanoscale Res. Lett.</i> , 2017, 12, 254. <sup>23</sup>           | 58             |
| 5 to 6 layer graphene | Choi <i>et al. Sci. Rep.</i> , 2016, 6, 24525. <sup>24</sup>                   | 50             |
| 8 layer graphene      | Karsy <i>et al. ACS Nano</i> , 2010, 4, 3839–3844. <sup>7</sup>                | 50             |



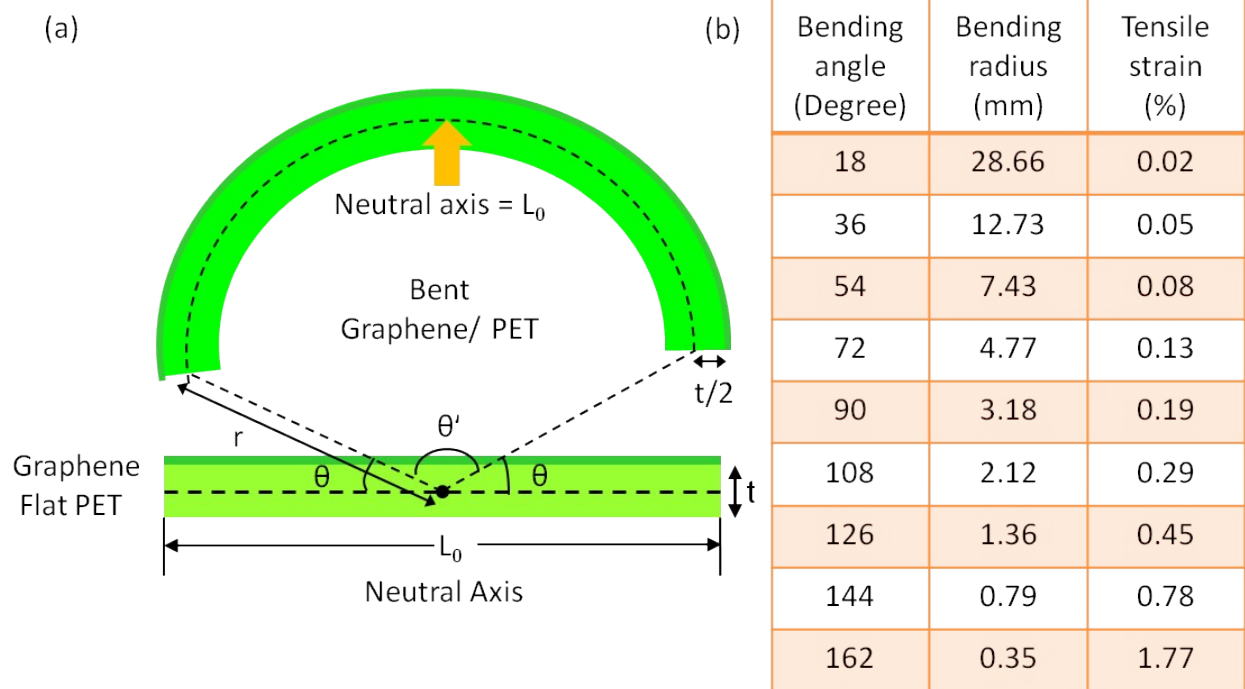

**Fig. S7** (a) Schematics of bending angle calculation. (b) Bending angle, bending radius and tensile strain values of present graphene film during flexibility test.
